# Supplementary material for: TLR Responses in Preterm and Term Infant Cord Blood Mononuclear Cells
Source: MDPI journal article supplement (doi:10.3390/pathogens12040596), 2023-04-14
Supplement: s1 [file s1]

**Supplementary Table S1:** List of antibodies used for flow cytometric experiments.

| <b>Antibody cocktail 1</b> | <b>Supplier</b>                              | <b>Dilution</b> |
|----------------------------|----------------------------------------------|-----------------|
| CD3-BUV395                 | BD Bioscience, San Diego, CA, USA            | 1/100           |
| CD14-BUV805                | BD Bioscience, San Diego, CA, USA            | 1/100           |
| CD16-PacBlue               | BD Bioscience, San Diego, CA, USA            | 1/400           |
| CD56-BV711                 | BioLegend, San Diego, USA                    | 1/50            |
| CD19-BV785                 | BioLegend, San Diego, USA                    | 1/400           |
| CD11c-PerCP/Cy5.5          | BD Bioscience, San Diego, CA, USA            | 1/200           |
| CD123-PEcy7                | BD Bioscience, San Diego, CA, USA            | 1/200           |
| HLA-DR-APCH7               | BD Bioscience, San Diego, CA, USA            | 1/200           |
| Zombie NIR                 | BioLegend, San Diego, USA                    | 1/800           |
| TLR2-BV650                 | BD Bioscience, San Diego, CA, USA            | 1/100           |
| TLR4-BV605                 | BD Bioscience, San Diego, CA, USA            | 1/200           |
| <b>Antibody cocktail 2</b> | <b>Supplier</b>                              | <b>Dilution</b> |
| TLR3-APC                   | Miltenyi Biotec, Bergisch Gladbach, Germany  | 1/100           |
| TLR7-FITC                  | Invitrogen, Thermofisher Scientific, CA, USA | 1/100           |
| TLR9-BV421                 | BioLegend, San Diego, USA                    | 1/200           |
| NF-KB-PE                   | Invitrogen, Thermofisher Scientific, CA, USA | 1/100           |
